# Supplementary material for: Disturbance Ecology Meets Bovine Tuberculosis (bTB) Epidemiology: A Before-and-After Study on the Association between Forest Clearfelling and bTB Herd Risk in Cattle Herds
Source: MDPI journal article supplement (doi:10.3390/pathogens11070807), 2022-07-19
Supplement: s1 [file s1]

## Supplementary material

**Table S1:** Population averaged Generalised Estimating Equations model of the risk of disclosing 1 or more reactors post forest clearfelling relative to pre-clearfelling in Ireland 2015-2018

| PARAMETER              | OR    | SE    | Z       | P     | UPPER<br>95%CI | LOWER<br>95%CI |
|------------------------|-------|-------|---------|-------|----------------|----------------|
| PRE/POST               | 1.187 | 0.068 | 3.010   | 0.003 | 1.062          | 1.328          |
| LOG(HERD SIZE)         | 1.706 | 0.065 | 14.020  | 0.000 | 1.583          | 1.839          |
| BEEF (REF)             | 1.000 |       |         |       |                |                |
| DAIRY                  | 1.379 | 0.148 | 3.000   | 0.003 | 1.118          | 1.701          |
| OTHER                  | 0.513 | 0.094 | -3.650  | 0.000 | 0.358          | 0.734          |
| SUCKLER                | 1.008 | 0.092 | 0.090   | 0.930 | 0.843          | 1.205          |
| PROPORTION<br>FORESTRY | 2.350 | 0.829 | 2.420   | 0.016 | 1.176          | 4.693          |
| CARLOW                 | 1.000 |       |         |       |                |                |
| CAVAN                  | 1.968 | 0.542 | 2.460   | 0.014 | 1.146          | 3.377          |
| CLARE                  | 1.598 | 0.420 | 1.790   | 0.074 | 0.955          | 2.673          |
| CORK                   | 0.897 | 0.220 | -0.450  | 0.656 | 0.555          | 1.449          |
| DONEGAL                | 0.718 | 0.226 | -1.050  | 0.294 | 0.388          | 1.331          |
| GALWAY                 | 1.303 | 0.353 | 0.980   | 0.329 | 0.766          | 2.217          |
| KERRY                  | 0.999 | 0.287 | 0.000   | 0.997 | 0.569          | 1.755          |
| KILKENNY               | 0.783 | 0.215 | -0.890  | 0.373 | 0.457          | 1.341          |
| LAOIS                  | 0.910 | 0.250 | -0.340  | 0.732 | 0.531          | 1.560          |
| LEITRIM                | 1.771 | 0.522 | 1.940   | 0.052 | 0.994          | 3.155          |
| LIMERICK               | 0.676 | 0.226 | -1.170  | 0.242 | 0.351          | 1.302          |
| LONGFORD               | 0.472 | 0.171 | -2.080  | 0.038 | 0.232          | 0.958          |
| LOUTH                  | 1.595 | 0.584 | 1.280   | 0.202 | 0.778          | 3.268          |
| MAYO                   | 0.861 | 0.253 | -0.510  | 0.611 | 0.484          | 1.532          |
| MEATH                  | 1.581 | 0.505 | 1.430   | 0.151 | 0.846          | 2.955          |
| MONAGHAN               | 1.695 | 0.516 | 1.730   | 0.083 | 0.933          | 3.079          |
| OFFALY                 | 0.943 | 0.281 | -0.200  | 0.843 | 0.525          | 1.692          |
| ROSCOMMON              | 0.944 | 0.288 | -0.190  | 0.849 | 0.519          | 1.716          |
| SLIGO                  | 1.498 | 0.421 | 1.440   | 0.151 | 0.863          | 2.598          |
| TIPPERARY              | 0.991 | 0.251 | -0.030  | 0.972 | 0.604          | 1.627          |
| WATERFORD              | 0.382 | 0.117 | -3.150  | 0.002 | 0.210          | 0.695          |
| WESTMEATH              | 1.791 | 0.500 | 2.090   | 0.037 | 1.037          | 3.094          |
| WEXFORD                | 1.273 | 0.351 | 0.880   | 0.381 | 0.741          | 2.187          |
| WICKLOW                | 3.217 | 0.791 | 4.750   | 0.000 | 1.987          | 5.208          |
| CONSTANT               | 0.004 | 0.001 | -19.640 | 0.000 | 0.002          | 0.006          |

## >2 reactors model

Similar results were found when the breakdown threshold was raised to 2 or more reactors.

However, the effect of pre/post clearfell was less certain, with the 95%ci of the odds ratio for the mixed effects model straddling 1 (0.992-1.419). This indicates that the positive association may not be robust when only 'large' breakdowns are used as our outcome variable. However, it should be noted, that the change of breakdown definition reduced the number of breakdown available to inform any trends, and therefore the power to detect an effect was diminished.

A similar result was found when the model was fit using a GEE framework; effect of pre/post OR: 1.17 (P=0.062; 95%ci: 0.992- 1.384).

**Table S2: Mixed effect model with >2 reactors as breakdown threshold**

| PARAMETER              | OR     | SE     | Z        | P      | UPPER<br>95%CI | LOWER<br>95%CI |
|------------------------|--------|--------|----------|--------|----------------|----------------|
| PRE/POST               | 1.1865 | 0.1083 | 1.8700   | 0.0610 | 0.9922         | 1.4190         |
| LOG(HERD SIZE)         | 2.3968 | 0.1576 | 13.3000  | 0.0000 | 2.1071         | 2.7264         |
| BEEF (REF)             |        |        |          |        |                |                |
| DAIRY                  | 1.5505 | 0.2705 | 2.5100   | 0.0120 | 1.1015         | 2.1825         |
| OTHER                  | 0.3778 | 0.1231 | -2.9900  | 0.0030 | 0.1994         | 0.7156         |
| SUCKLER                | 1.0879 | 0.1690 | 0.5400   | 0.5880 | 0.8022         | 1.4752         |
| PROPORTION<br>FORESTRY | 5.2201 | 2.8598 | 3.0200   | 0.0030 | 1.7839         | 15.2756        |
| CONSTANT               | 0.0002 | 0.0001 | -24.7100 | 0.0000 | 0.0001         | 0.0003         |

**Table S3: GEE model with >2 reactor threshold**

| PARAMETER      | OR    | SE    | Z      | P     | UPPER<br>95%CI | LOWER<br>95%CI |
|----------------|-------|-------|--------|-------|----------------|----------------|
| PRE/POST       | 1.172 | 0.099 | 1.870  | 0.062 | 0.992          | 1.384          |
| LOG(HERD SIZE) | 2.274 | 0.137 | 13.640 | 0.000 | 2.021          | 2.559          |
| BEEF (REF)     |       |       |        |       |                |                |
| DAIRY          | 1.523 | 0.247 | 2.590  | 0.009 | 1.108          | 2.093          |
| OTHER          | 0.405 | 0.129 | -2.850 | 0.004 | 0.217          | 0.755          |
| SUCKLER        | 1.098 | 0.161 | 0.630  | 0.526 | 0.823          | 1.463          |

|                                           |       |       |         |       |       |        |
|-------------------------------------------|-------|-------|---------|-------|-------|--------|
| <b>PROPORTION<br/>FORESTRY<br/>CARLOW</b> | 5.001 | 2.488 | 3.240   | 0.001 | 1.886 | 13.258 |
| <b>CAVAN</b>                              | 3.085 | 1.311 | 2.650   | 0.008 | 1.341 | 7.095  |
| <b>CLARE</b>                              | 1.998 | 0.833 | 1.660   | 0.097 | 0.882 | 4.525  |
| <b>CORK</b>                               | 1.131 | 0.438 | 0.320   | 0.751 | 0.529 | 2.417  |
| <b>DONEGAL</b>                            | 0.999 | 0.495 | 0.000   | 0.999 | 0.378 | 2.639  |
| <b>GALWAY</b>                             | 1.481 | 0.649 | 0.900   | 0.370 | 0.627 | 3.498  |
| <b>KERRY</b>                              | 1.377 | 0.621 | 0.710   | 0.478 | 0.569 | 3.332  |
| <b>KILKENNY</b>                           | 0.435 | 0.207 | -1.750  | 0.081 | 0.171 | 1.107  |
| <b>LAOIS</b>                              | 0.845 | 0.375 | -0.380  | 0.704 | 0.354 | 2.017  |
| <b>LEITRIM</b>                            | 2.520 | 1.195 | 1.950   | 0.051 | 0.994 | 6.385  |
| <b>LIMERICK</b>                           | 1.165 | 0.559 | 0.320   | 0.751 | 0.455 | 2.984  |
| <b>LONGFORD</b>                           | 0.319 | 0.224 | -1.630  | 0.104 | 0.080 | 1.265  |
| <b>LOUTH</b>                              | 1.847 | 1.106 | 1.020   | 0.306 | 0.571 | 5.973  |
| <b>MAYO</b>                               | 0.986 | 0.480 | -0.030  | 0.977 | 0.380 | 2.559  |
| <b>MEATH</b>                              | 2.386 | 1.134 | 1.830   | 0.067 | 0.940 | 6.057  |
| <b>MONAGHAN</b>                           | 3.015 | 1.361 | 2.440   | 0.015 | 1.245 | 7.304  |
| <b>OFFALY</b>                             | 1.079 | 0.507 | 0.160   | 0.871 | 0.430 | 2.710  |
| <b>ROSCOMMON</b>                          | 1.161 | 0.577 | 0.300   | 0.763 | 0.438 | 3.077  |
| <b>SLIGO</b>                              | 0.823 | 0.445 | -0.360  | 0.719 | 0.285 | 2.375  |
| <b>TIPPERARY</b>                          | 1.191 | 0.473 | 0.440   | 0.661 | 0.546 | 2.596  |
| <b>WATERFORD</b>                          | 0.369 | 0.176 | -2.090  | 0.037 | 0.145 | 0.942  |
| <b>WESTMEATH</b>                          | 2.963 | 1.252 | 2.570   | 0.010 | 1.294 | 6.784  |
| <b>WEXFORD</b>                            | 1.128 | 0.502 | 0.270   | 0.787 | 0.471 | 2.698  |
| <b>WICKLOW</b>                            | 4.638 | 1.789 | 3.980   | 0.000 | 2.177 | 9.879  |
| <b>CONSTANT</b>                           | 0.000 | 0.000 | -17.210 | 0.000 | 0.000 | 0.001  |

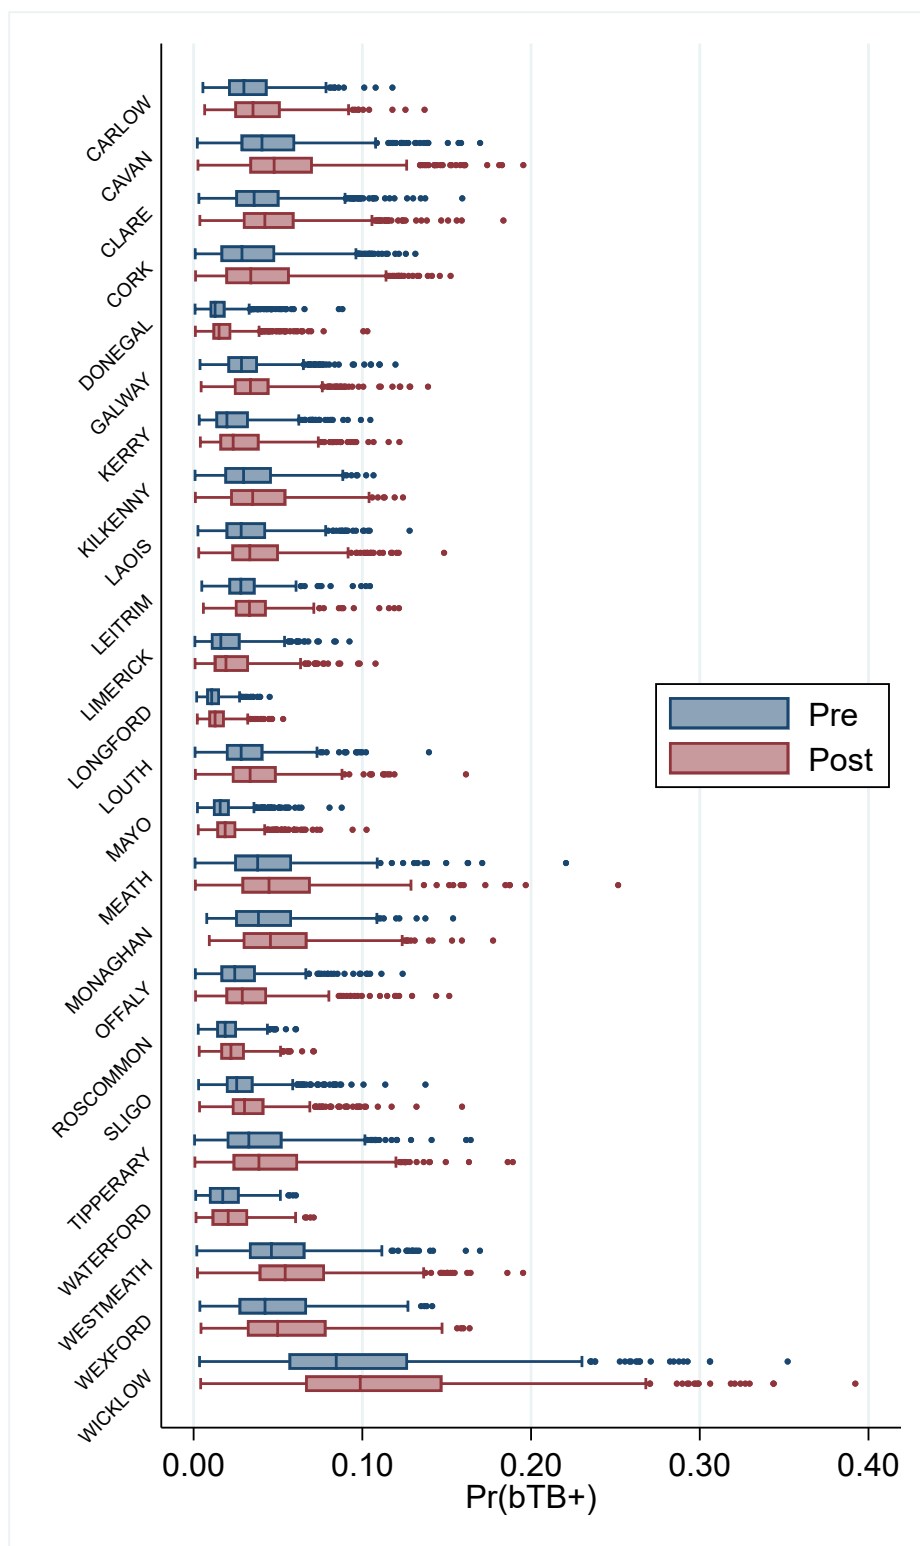

**Figure S1:** Variation in estimated risk of one or more bTB reactor being disclosed within cattle herds across counties prior-to and post a clearfelling forestry event in the vicinity (3km search radius)

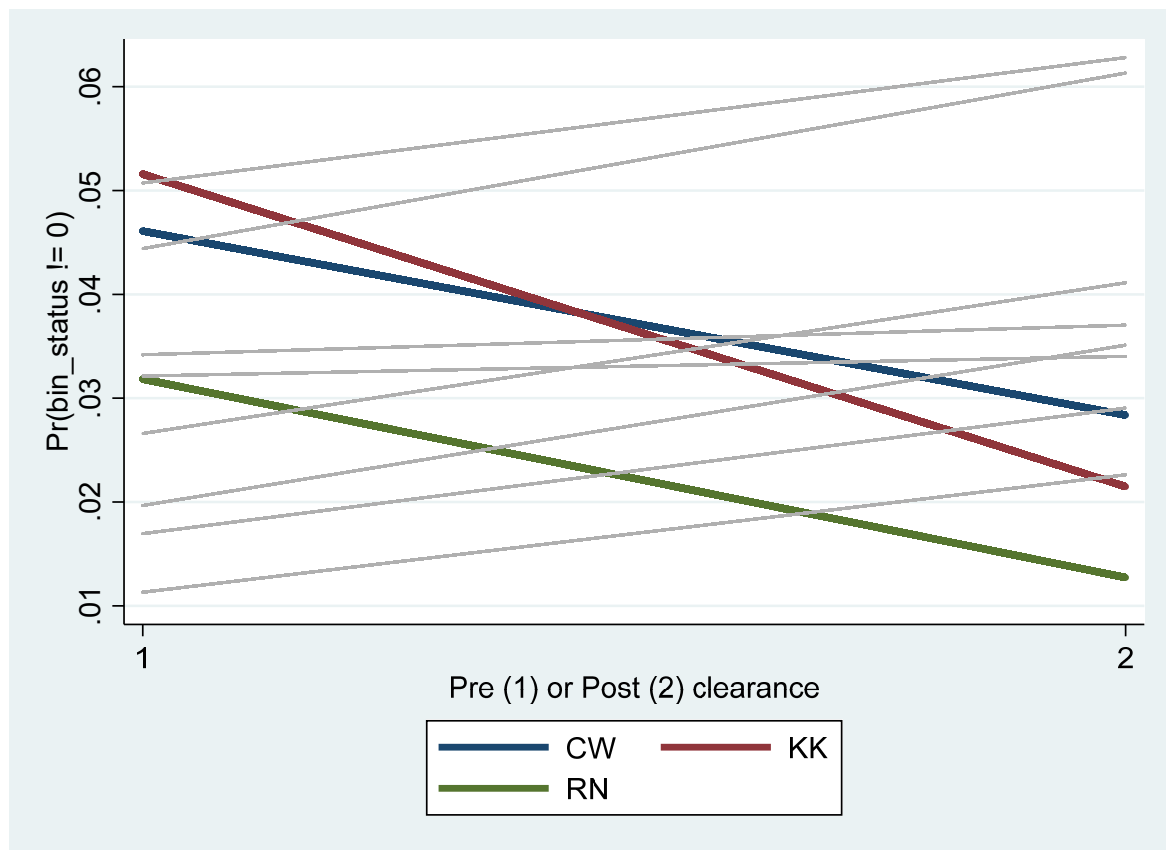

**Figure S2:** Relationship between bTB risk pre and post forest clearance activities estimated demonstrated 12 counties in Ireland. Three counties (Carlow = CW, Kilkenny = KK, and Roscommon = RN) had significantly different trend to all other counties modelled (total n=24).

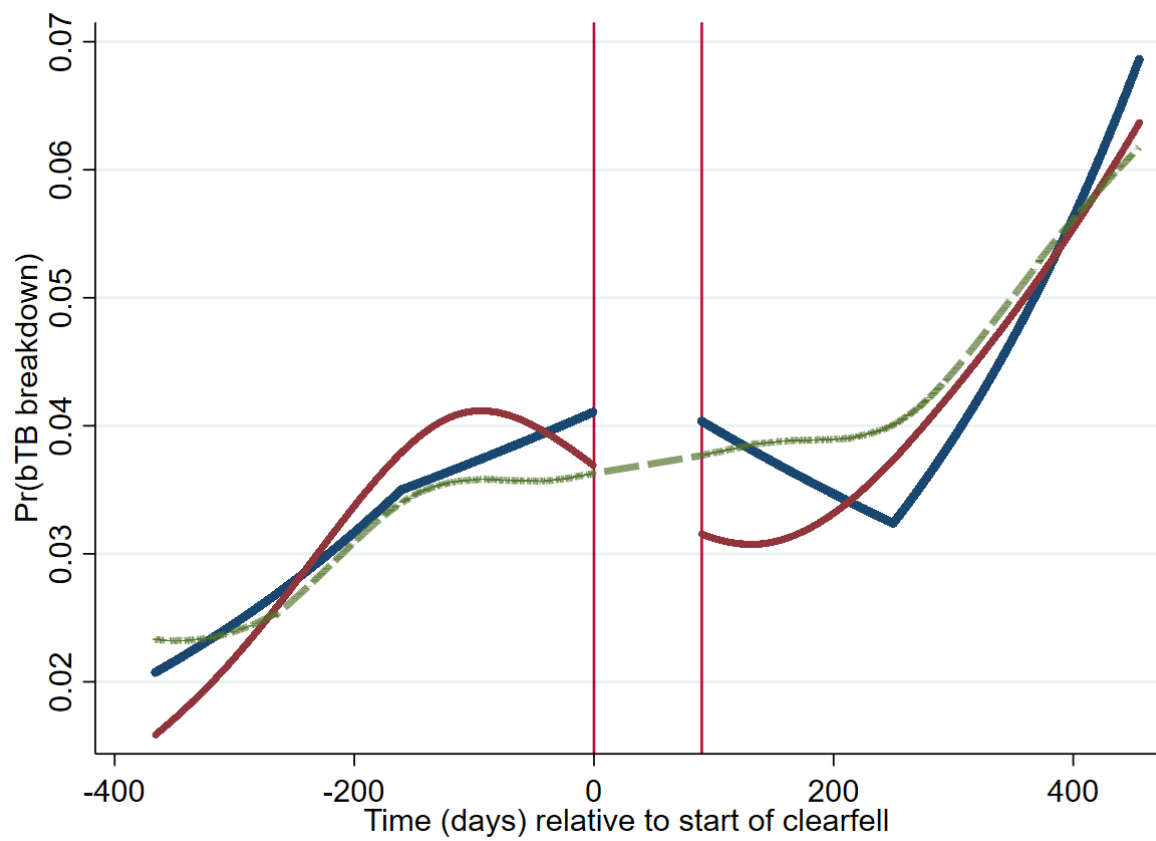

**Figure S3:** Time series plot of the estimated probability of bTB breakdown failure for cattle herd prior to (before day 0) and after a forest clearfell (after day 90). Dashed line (green) output from a locally weighted regression (LOWESS); red line is the mean predicted probability of failure from a cubic spline model; black line is the mean predicted probability of failure from a linear spline model.

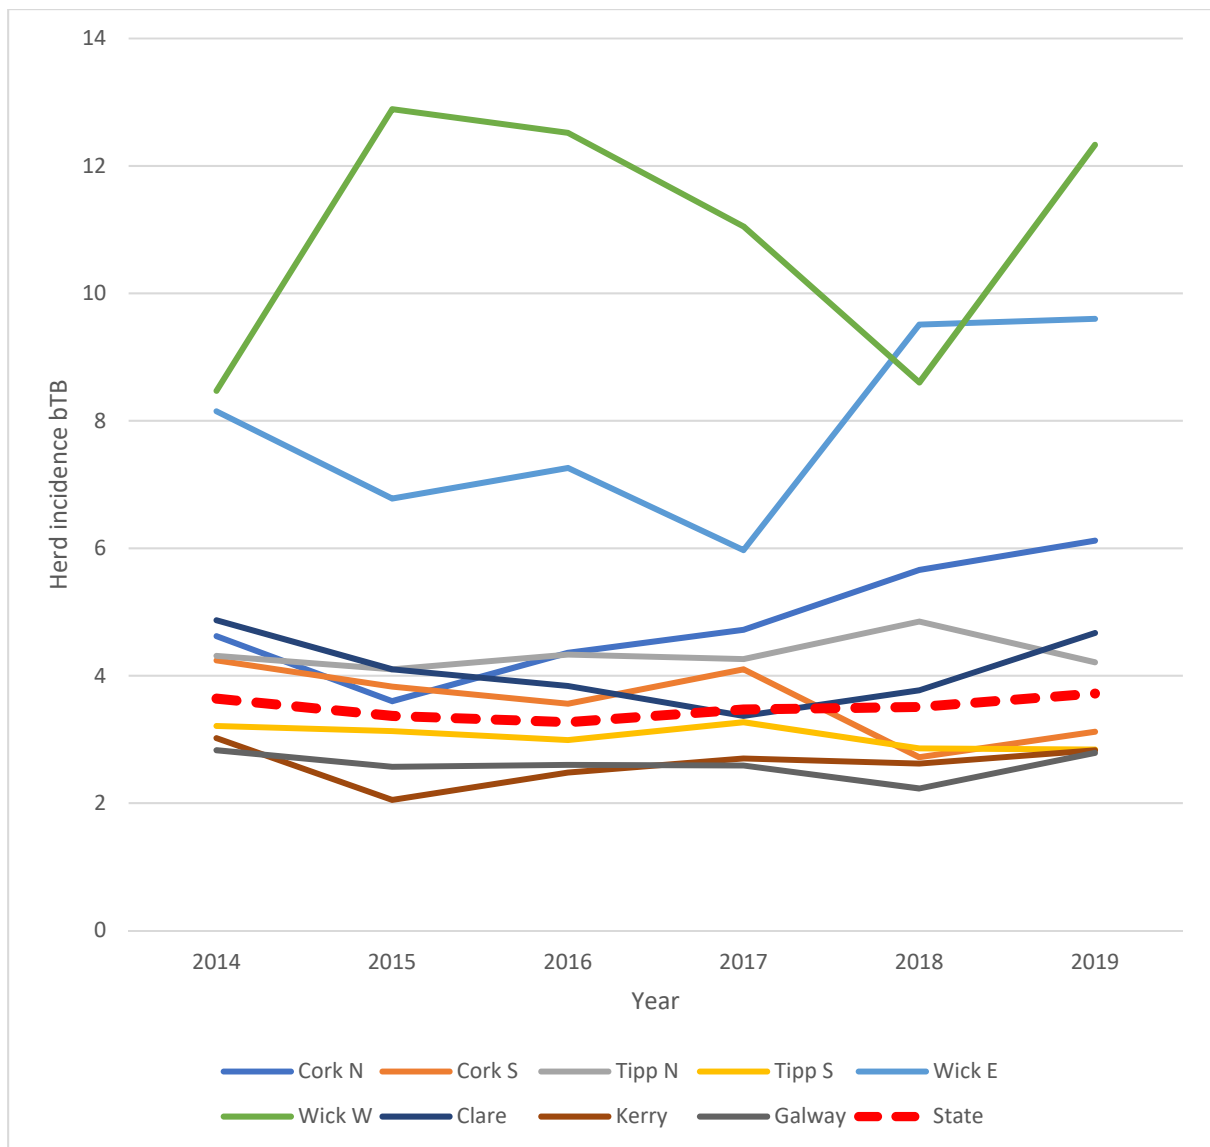

**Figure S4: National trend in bTB herd incidence from year 2014-2019. The red dashed line is the overall country trend. Counties included were the most represented within the dataset with >3000 records each.**

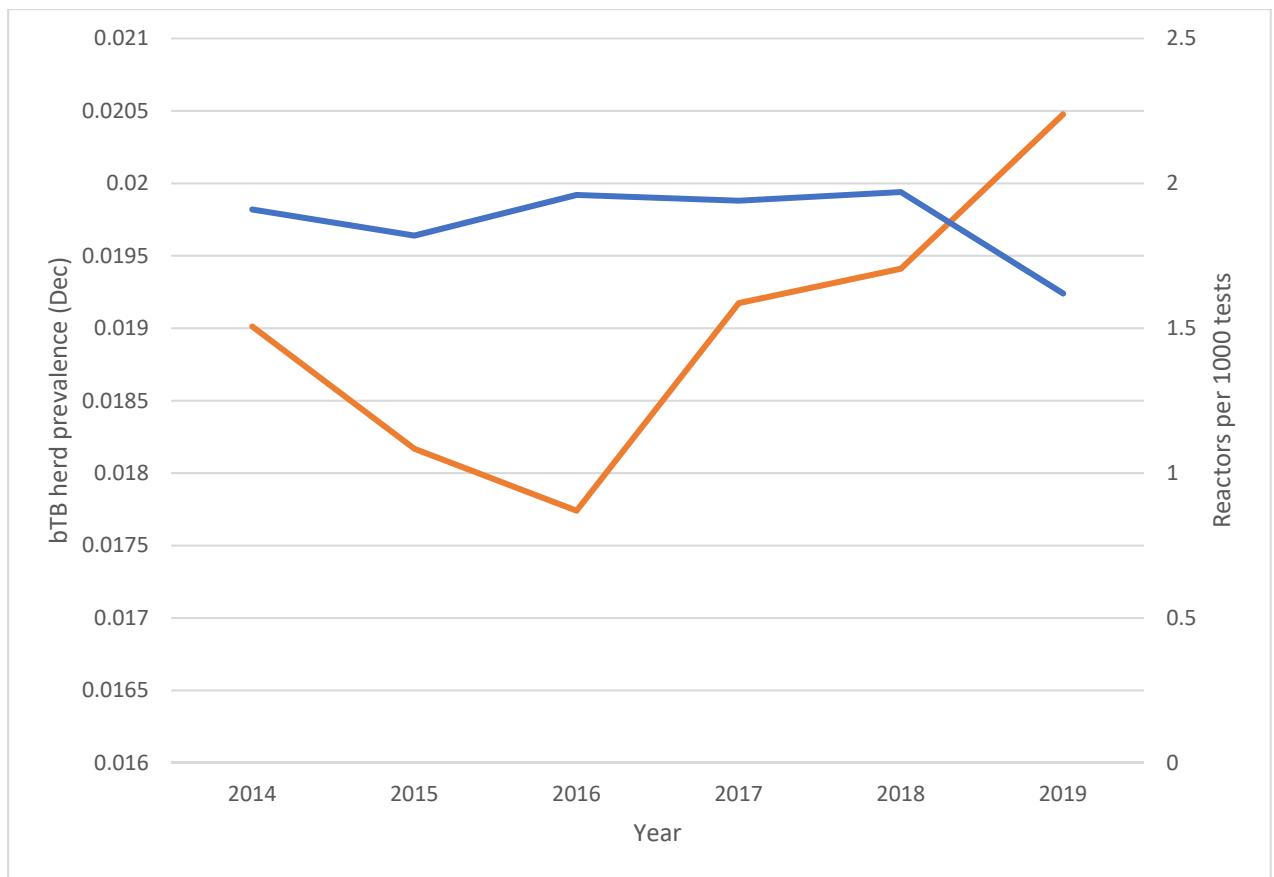

**Figure S5: National trend in bTB herd prevalence (orange) and individual level test failures per 1000 tests (blue) from year 2014-2019.**



**Table S4: Example code and sample data (n=1000 herds; 2000 observations). Base univariable model: `xi: xtmelogit outcome_status i.pre_post ||herd_no:`, or `intpoints(12) level(95)`, where `outcome_status` is whether the herd experienced a breakdown during the observation period; `pre_post` is a binary variable representing whether the obseration period was prior to or after a clearfell event; `herd_no` is an anonymised marker identifier variable for each herd.**

| outcome_status | pre_post | herd_no |
|----------------|----------|---------|
| 0              | 0        | 5001    |
| 0              | 1        | 5001    |
| 0              | 0        | 5002    |
| 0              | 1        | 5002    |
| 0              | 0        | 5003    |
| 0              | 1        | 5003    |
| 0              | 0        | 5004    |
| 0              | 1        | 5004    |
| 0              | 0        | 5005    |
| 0              | 1        | 5005    |
| 0              | 0        | 5006    |
| 0              | 1        | 5006    |
| 0              | 0        | 5007    |
| 0              | 1        | 5007    |
| 0              | 0        | 5008    |
| 0              | 1        | 5008    |
| 0              | 0        | 5009    |
| 0              | 1        | 5009    |
| 0              | 0        | 5010    |
| 0              | 1        | 5010    |
| 0              | 0        | 5011    |
| 0              | 1        | 5011    |
| 0              | 0        | 5012    |
| 0              | 1        | 5012    |
| 0              | 0        | 5013    |
| 0              | 1        | 5013    |
| 0              | 0        | 5014    |
| 0              | 1        | 5014    |
| 0              | 0        | 5015    |
| 0              | 1        | 5015    |
| 0              | 0        | 5016    |
| 0              | 1        | 5016    |
| 0              | 0        | 5017    |
| 0              | 1        | 5017    |
| 0              | 0        | 5018    |
| 0              | 1        | 5018    |
| 0              | 0        | 5019    |
| 0              | 1        | 5019    |
| 0              | 0        | 5020    |
| 0              | 1        | 5020    |
| 0              | 0        | 5021    |
| 0              | 1        | 5021    |
| 0              | 0        | 5022    |
| 0              | 1        | 5022    |
| 0              | 0        | 5023    |
| 0              | 1        | 5023    |
| 0              | 0        | 5024    |
| 0              | 1        | 5024    |
| 0              | 0        | 5025    |
| 0              | 1        | 5025    |
| 0              | 0        | 5026    |
| 0              | 1        | 5026    |
| 0              | 0        | 5027    |
| 0              | 1        | 5027    |
| 0              | 0        | 5028    |
| 0              | 1        | 5028    |
| 0              | 0        | 5029    |
| 0              | 1        | 5029    |
| 0              | 0        | 5030    |
| 0              | 1        | 5030    |
| 0              | 0        | 5031    |
| 0              | 1        | 5031    |
| 0              | 0        | 5032    |
| 0              | 1        | 5032    |
| 0              | 0        | 5033    |

|   |   |      |
|---|---|------|
| 0 | 1 | 5033 |
| 0 | 0 | 5034 |
| 0 | 1 | 5034 |
| 0 | 0 | 5035 |
| 0 | 1 | 5035 |
| 0 | 0 | 5036 |
| 0 | 1 | 5036 |
| 0 | 0 | 5037 |
| 0 | 1 | 5037 |
| 0 | 0 | 5038 |
| 0 | 1 | 5038 |
| 0 | 0 | 5039 |
| 0 | 1 | 5039 |
| 0 | 0 | 5040 |
| 0 | 1 | 5040 |
| 1 | 0 | 5041 |
| 0 | 1 | 5041 |
| 0 | 0 | 5042 |
| 0 | 1 | 5042 |
| 0 | 0 | 5043 |
| 0 | 1 | 5043 |
| 0 | 0 | 5044 |
| 0 | 1 | 5044 |
| 0 | 0 | 5045 |
| 0 | 1 | 5045 |
| 0 | 0 | 5046 |
| 0 | 1 | 5046 |
| 0 | 0 | 5047 |
| 0 | 1 | 5047 |
| 0 | 0 | 5048 |
| 1 | 1 | 5048 |
| 0 | 0 | 5049 |
| 0 | 1 | 5049 |
| 0 | 0 | 5050 |
| 0 | 1 | 5050 |
| 0 | 0 | 5051 |
| 0 | 1 | 5051 |
| 0 | 0 | 5052 |
| 0 | 1 | 5052 |
| 0 | 0 | 5053 |
| 0 | 1 | 5053 |
| 0 | 0 | 5054 |
| 0 | 1 | 5054 |
| 0 | 0 | 5055 |
| 0 | 1 | 5055 |
| 0 | 0 | 5056 |
| 0 | 1 | 5056 |
| 0 | 0 | 5057 |
| 0 | 1 | 5057 |
| 0 | 0 | 5058 |
| 0 | 1 | 5058 |
| 0 | 0 | 5059 |
| 0 | 1 | 5059 |
| 0 | 0 | 5060 |
| 0 | 1 | 5060 |
| 0 | 0 | 5061 |
| 0 | 1 | 5061 |
| 0 | 0 | 5062 |
| 0 | 1 | 5062 |
| 0 | 0 | 5063 |
| 0 | 1 | 5063 |
| 0 | 0 | 5064 |
| 1 | 1 | 5064 |
| 0 | 0 | 5065 |
| 0 | 1 | 5065 |
| 0 | 0 | 5066 |
| 1 | 1 | 5066 |
| 0 | 0 | 5067 |
| 1 | 1 | 5067 |
| 0 | 0 | 5068 |
| 0 | 1 | 5068 |
| 0 | 0 | 5069 |
| 0 | 1 | 5069 |
| 0 | 0 | 5070 |
| 0 | 1 | 5070 |
| 0 | 0 | 5071 |
| 0 | 1 | 5071 |

|   |   |      |
|---|---|------|
| 0 | 0 | 5072 |
| 1 | 1 | 5072 |
| 0 | 0 | 5073 |
| 0 | 1 | 5073 |
| 0 | 0 | 5074 |
| 0 | 1 | 5074 |
| 0 | 0 | 5075 |
| 0 | 1 | 5075 |
| 0 | 0 | 5076 |
| 0 | 1 | 5076 |
| 0 | 0 | 5077 |
| 0 | 1 | 5077 |
| 0 | 0 | 5078 |
| 0 | 1 | 5078 |
| 0 | 0 | 5079 |
| 0 | 1 | 5079 |
| 0 | 0 | 5080 |
| 0 | 1 | 5080 |
| 0 | 0 | 5081 |
| 0 | 1 | 5081 |
| 0 | 0 | 5082 |
| 0 | 1 | 5082 |
| 0 | 0 | 5083 |
| 0 | 1 | 5083 |
| 0 | 0 | 5084 |
| 0 | 1 | 5084 |
| 0 | 0 | 5085 |
| 0 | 1 | 5085 |
| 0 | 0 | 5086 |
| 1 | 1 | 5086 |
| 0 | 0 | 5087 |
| 0 | 1 | 5087 |
| 1 | 0 | 5088 |
| 0 | 1 | 5088 |
| 0 | 0 | 5089 |
| 0 | 1 | 5089 |
| 0 | 0 | 5090 |
| 0 | 1 | 5090 |
| 0 | 0 | 5091 |
| 0 | 1 | 5091 |
| 0 | 0 | 5092 |
| 0 | 1 | 5092 |
| 0 | 0 | 5093 |
| 0 | 1 | 5093 |
| 0 | 0 | 5094 |
| 1 | 1 | 5094 |
| 0 | 0 | 5095 |
| 0 | 1 | 5095 |
| 0 | 0 | 5096 |
| 0 | 1 | 5096 |
| 0 | 0 | 5097 |
| 0 | 1 | 5097 |
| 0 | 0 | 5098 |
| 0 | 1 | 5098 |
| 0 | 0 | 5099 |
| 0 | 1 | 5099 |
| 0 | 0 | 5100 |
| 0 | 1 | 5100 |
| 0 | 0 | 5101 |
| 0 | 1 | 5101 |
| 0 | 0 | 5102 |
| 0 | 1 | 5102 |
| 0 | 0 | 5103 |
| 0 | 1 | 5103 |
| 0 | 0 | 5104 |
| 0 | 1 | 5104 |
| 0 | 0 | 5105 |
| 0 | 1 | 5105 |
| 0 | 0 | 5106 |
| 0 | 1 | 5106 |
| 0 | 0 | 5107 |
| 0 | 1 | 5107 |
| 0 | 0 | 5108 |
| 0 | 1 | 5108 |
| 0 | 0 | 5109 |
| 0 | 1 | 5109 |
| 1 | 0 | 5110 |

|   |   |      |
|---|---|------|
| 0 | 1 | 5110 |
| 0 | 0 | 5111 |
| 0 | 1 | 5111 |
| 0 | 0 | 5112 |
| 0 | 1 | 5112 |
| 0 | 0 | 5113 |
| 0 | 1 | 5113 |
| 0 | 0 | 5114 |
| 0 | 1 | 5114 |
| 0 | 0 | 5115 |
| 0 | 1 | 5115 |
| 0 | 0 | 5116 |
| 0 | 1 | 5116 |
| 0 | 0 | 5117 |
| 0 | 1 | 5117 |
| 0 | 0 | 5118 |
| 0 | 1 | 5118 |
| 0 | 0 | 5119 |
| 0 | 1 | 5119 |
| 0 | 0 | 5120 |
| 0 | 1 | 5120 |
| 0 | 0 | 5121 |
| 0 | 1 | 5121 |
| 0 | 0 | 5122 |
| 0 | 1 | 5122 |
| 0 | 0 | 5123 |
| 0 | 1 | 5123 |
| 0 | 0 | 5124 |
| 0 | 1 | 5124 |
| 0 | 0 | 5125 |
| 0 | 1 | 5125 |
| 0 | 0 | 5126 |
| 0 | 1 | 5126 |
| 0 | 0 | 5127 |
| 0 | 1 | 5127 |
| 0 | 0 | 5128 |
| 0 | 1 | 5128 |
| 0 | 0 | 5129 |
| 0 | 1 | 5129 |
| 0 | 0 | 5130 |
| 0 | 1 | 5130 |
| 0 | 0 | 5131 |
| 0 | 1 | 5131 |
| 0 | 0 | 5132 |
| 0 | 1 | 5132 |
| 0 | 0 | 5133 |
| 0 | 1 | 5133 |
| 0 | 0 | 5134 |
| 0 | 1 | 5134 |
| 0 | 0 | 5135 |
| 0 | 1 | 5135 |
| 0 | 0 | 5136 |
| 0 | 1 | 5136 |
| 0 | 0 | 5137 |
| 0 | 1 | 5137 |
| 0 | 0 | 5138 |
| 0 | 1 | 5138 |
| 0 | 0 | 5139 |
| 0 | 1 | 5139 |
| 0 | 0 | 5140 |
| 0 | 1 | 5140 |
| 0 | 0 | 5141 |
| 0 | 1 | 5141 |
| 0 | 0 | 5142 |
| 0 | 1 | 5142 |
| 0 | 0 | 5143 |
| 0 | 1 | 5143 |
| 0 | 0 | 5144 |
| 0 | 1 | 5144 |
| 0 | 0 | 5145 |
| 0 | 1 | 5145 |
| 0 | 0 | 5146 |
| 0 | 1 | 5146 |
| 0 | 0 | 5147 |
| 0 | 1 | 5147 |
| 0 | 0 | 5148 |
| 0 | 1 | 5148 |

|   |   |      |
|---|---|------|
| 0 | 0 | 5149 |
| 0 | 1 | 5149 |
| 0 | 0 | 5150 |
| 0 | 1 | 5150 |
| 0 | 0 | 5151 |
| 0 | 1 | 5151 |
| 0 | 0 | 5152 |
| 0 | 1 | 5152 |
| 0 | 0 | 5153 |
| 0 | 1 | 5153 |
| 0 | 0 | 5154 |
| 0 | 1 | 5154 |
| 0 | 0 | 5155 |
| 0 | 1 | 5155 |
| 0 | 0 | 5156 |
| 0 | 1 | 5156 |
| 0 | 0 | 5157 |
| 0 | 1 | 5157 |
| 0 | 0 | 5158 |
| 0 | 1 | 5158 |
| 0 | 0 | 5159 |
| 0 | 1 | 5159 |
| 0 | 0 | 5160 |
| 0 | 1 | 5160 |
| 1 | 0 | 5161 |
| 0 | 1 | 5161 |
| 0 | 0 | 5162 |
| 0 | 1 | 5162 |
| 0 | 0 | 5163 |
| 0 | 1 | 5163 |
| 0 | 0 | 5164 |
| 0 | 1 | 5164 |
| 0 | 0 | 5165 |
| 0 | 1 | 5165 |
| 0 | 0 | 5166 |
| 0 | 1 | 5166 |
| 0 | 0 | 5167 |
| 0 | 1 | 5167 |
| 0 | 0 | 5168 |
| 0 | 1 | 5168 |
| 0 | 0 | 5169 |
| 0 | 1 | 5169 |
| 0 | 0 | 5170 |
| 0 | 1 | 5170 |
| 0 | 0 | 5171 |
| 0 | 1 | 5171 |
| 0 | 0 | 5172 |
| 0 | 1 | 5172 |
| 0 | 0 | 5173 |
| 0 | 1 | 5173 |
| 0 | 0 | 5174 |
| 0 | 1 | 5174 |
| 0 | 0 | 5175 |
| 0 | 1 | 5175 |
| 0 | 0 | 5176 |
| 0 | 1 | 5176 |
| 0 | 0 | 5177 |
| 0 | 1 | 5177 |
| 0 | 0 | 5178 |
| 1 | 1 | 5178 |
| 0 | 0 | 5179 |
| 0 | 1 | 5179 |
| 0 | 0 | 5180 |
| 0 | 1 | 5180 |
| 0 | 0 | 5181 |
| 0 | 1 | 5181 |
| 0 | 0 | 5182 |
| 0 | 1 | 5182 |
| 0 | 0 | 5183 |
| 0 | 1 | 5183 |
| 1 | 0 | 5184 |
| 0 | 1 | 5184 |
| 0 | 0 | 5185 |
| 0 | 1 | 5185 |
| 0 | 0 | 5186 |
| 0 | 1 | 5186 |
| 0 | 0 | 5187 |

|   |   |      |
|---|---|------|
| 0 | 1 | 5187 |
| 1 | 0 | 5188 |
| 0 | 1 | 5188 |
| 0 | 0 | 5189 |
| 0 | 1 | 5189 |
| 0 | 0 | 5190 |
| 0 | 1 | 5190 |
| 1 | 0 | 5191 |
| 0 | 1 | 5191 |
| 0 | 0 | 5192 |
| 0 | 1 | 5192 |
| 1 | 0 | 5193 |
| 0 | 1 | 5193 |
| 0 | 0 | 5194 |
| 0 | 1 | 5194 |
| 0 | 0 | 5195 |
| 1 | 1 | 5195 |
| 0 | 0 | 5196 |
| 0 | 1 | 5196 |
| 0 | 0 | 5197 |
| 0 | 1 | 5197 |
| 0 | 0 | 5198 |
| 0 | 1 | 5198 |
| 0 | 0 | 5199 |
| 0 | 1 | 5199 |
| 0 | 0 | 5200 |
| 0 | 1 | 5200 |
| 0 | 0 | 5201 |
| 0 | 1 | 5201 |
| 0 | 0 | 5202 |
| 0 | 1 | 5202 |
| 0 | 0 | 5203 |
| 0 | 1 | 5203 |
| 0 | 0 | 5204 |
| 0 | 1 | 5204 |
| 0 | 0 | 5205 |
| 0 | 1 | 5205 |
| 1 | 0 | 5206 |
| 0 | 1 | 5206 |
| 0 | 0 | 5207 |
| 0 | 1 | 5207 |
| 0 | 0 | 5208 |
| 1 | 1 | 5208 |
| 0 | 0 | 5209 |
| 0 | 1 | 5209 |
| 0 | 0 | 5210 |
| 0 | 1 | 5210 |
| 0 | 0 | 5211 |
| 0 | 1 | 5211 |
| 0 | 0 | 5212 |
| 0 | 1 | 5212 |
| 0 | 0 | 5213 |
| 0 | 1 | 5213 |
| 0 | 0 | 5214 |
| 0 | 1 | 5214 |
| 0 | 0 | 5215 |
| 0 | 1 | 5215 |
| 0 | 0 | 5216 |
| 0 | 1 | 5216 |
| 0 | 0 | 5217 |
| 0 | 1 | 5217 |
| 0 | 0 | 5218 |
| 0 | 1 | 5218 |
| 0 | 0 | 5219 |
| 0 | 1 | 5219 |
| 0 | 0 | 5220 |
| 0 | 1 | 5220 |
| 0 | 0 | 5221 |
| 0 | 1 | 5221 |
| 0 | 0 | 5222 |
| 0 | 1 | 5222 |
| 0 | 0 | 5223 |
| 0 | 1 | 5223 |
| 0 | 0 | 5224 |
| 0 | 1 | 5224 |
| 0 | 0 | 5225 |
| 0 | 1 | 5225 |

|   |   |      |
|---|---|------|
| 0 | 0 | 5226 |
| 0 | 1 | 5226 |
| 0 | 0 | 5227 |
| 0 | 1 | 5227 |
| 0 | 0 | 5228 |
| 0 | 1 | 5228 |
| 0 | 0 | 5229 |
| 0 | 1 | 5229 |
| 0 | 0 | 5230 |
| 0 | 1 | 5230 |
| 0 | 0 | 5231 |
| 0 | 1 | 5231 |
| 0 | 0 | 5232 |
| 0 | 1 | 5232 |
| 0 | 0 | 5233 |
| 0 | 1 | 5233 |
| 0 | 0 | 5234 |
| 0 | 1 | 5234 |
| 0 | 0 | 5235 |
| 0 | 1 | 5235 |
| 0 | 0 | 5236 |
| 0 | 1 | 5236 |
| 0 | 0 | 5237 |
| 0 | 1 | 5237 |
| 0 | 0 | 5238 |
| 0 | 1 | 5238 |
| 0 | 0 | 5239 |
| 0 | 1 | 5239 |
| 0 | 0 | 5240 |
| 0 | 1 | 5240 |
| 0 | 0 | 5241 |
| 0 | 1 | 5241 |
| 0 | 0 | 5242 |
| 0 | 1 | 5242 |
| 0 | 0 | 5243 |
| 0 | 1 | 5243 |
| 0 | 0 | 5244 |
| 0 | 1 | 5244 |
| 0 | 0 | 5245 |
| 0 | 1 | 5245 |
| 0 | 0 | 5246 |
| 0 | 1 | 5246 |
| 0 | 0 | 5247 |
| 0 | 1 | 5247 |
| 0 | 0 | 5248 |
| 0 | 1 | 5248 |
| 0 | 0 | 5249 |
| 0 | 1 | 5249 |
| 0 | 0 | 5250 |
| 0 | 1 | 5250 |
| 0 | 0 | 5251 |
| 0 | 1 | 5251 |
| 0 | 0 | 5252 |
| 0 | 1 | 5252 |
| 0 | 0 | 5253 |
| 0 | 1 | 5253 |
| 0 | 0 | 5254 |
| 0 | 1 | 5254 |
| 0 | 0 | 5255 |
| 0 | 1 | 5255 |
| 0 | 0 | 5256 |
| 0 | 1 | 5256 |
| 0 | 0 | 5257 |
| 0 | 1 | 5257 |
| 0 | 0 | 5258 |
| 0 | 1 | 5258 |
| 0 | 0 | 5259 |
| 0 | 1 | 5259 |
| 0 | 0 | 5260 |
| 0 | 1 | 5260 |
| 0 | 0 | 5261 |
| 0 | 1 | 5261 |
| 0 | 0 | 5262 |
| 0 | 1 | 5262 |
| 0 | 0 | 5263 |
| 0 | 1 | 5263 |
| 0 | 0 | 5264 |

|   |   |      |
|---|---|------|
| 0 | 1 | 5264 |
| 0 | 0 | 5265 |
| 0 | 1 | 5265 |
| 0 | 0 | 5266 |
| 0 | 1 | 5266 |
| 0 | 0 | 5267 |
| 0 | 1 | 5267 |
| 0 | 0 | 5268 |
| 0 | 1 | 5268 |
| 0 | 0 | 5269 |
| 0 | 1 | 5269 |
| 0 | 0 | 5270 |
| 0 | 1 | 5270 |
| 0 | 0 | 5271 |
| 0 | 1 | 5271 |
| 0 | 0 | 5272 |
| 0 | 1 | 5272 |
| 0 | 0 | 5273 |
| 0 | 1 | 5273 |
| 0 | 0 | 5274 |
| 0 | 1 | 5274 |
| 0 | 0 | 5275 |
| 0 | 1 | 5275 |
| 0 | 0 | 5276 |
| 0 | 1 | 5276 |
| 0 | 0 | 5277 |
| 0 | 1 | 5277 |
| 0 | 0 | 5278 |
| 0 | 1 | 5278 |
| 0 | 0 | 5279 |
| 0 | 1 | 5279 |
| 0 | 0 | 5280 |
| 0 | 1 | 5280 |
| 0 | 0 | 5281 |
| 0 | 1 | 5281 |
| 0 | 0 | 5282 |
| 0 | 1 | 5282 |
| 0 | 0 | 5283 |
| 0 | 1 | 5283 |
| 0 | 0 | 5284 |
| 0 | 1 | 5284 |
| 0 | 0 | 5285 |
| 0 | 1 | 5285 |
| 0 | 0 | 5286 |
| 0 | 1 | 5286 |
| 0 | 0 | 5287 |
| 0 | 1 | 5287 |
| 0 | 0 | 5288 |
| 0 | 1 | 5288 |
| 0 | 0 | 5289 |
| 0 | 1 | 5289 |
| 0 | 0 | 5290 |
| 0 | 1 | 5290 |
| 0 | 0 | 5291 |
| 0 | 1 | 5291 |
| 0 | 0 | 5292 |
| 0 | 1 | 5292 |
| 0 | 0 | 5293 |
| 0 | 1 | 5293 |
| 0 | 0 | 5294 |
| 0 | 1 | 5294 |
| 0 | 0 | 5295 |
| 0 | 1 | 5295 |
| 0 | 0 | 5296 |
| 0 | 1 | 5296 |
| 0 | 0 | 5297 |
| 0 | 1 | 5297 |
| 0 | 0 | 5298 |
| 0 | 1 | 5298 |
| 0 | 0 | 5299 |
| 0 | 1 | 5299 |
| 0 | 0 | 5300 |
| 0 | 1 | 5300 |
| 0 | 0 | 5301 |
| 0 | 1 | 5301 |
| 0 | 0 | 5302 |
| 0 | 1 | 5302 |



|   |   |      |
|---|---|------|
| 0 | 0 | 5303 |
| 0 | 1 | 5303 |
| 0 | 0 | 5304 |
| 0 | 1 | 5304 |
| 0 | 0 | 5305 |
| 0 | 1 | 5305 |
| 0 | 0 | 5306 |
| 0 | 1 | 5306 |
| 0 | 0 | 5307 |
| 0 | 1 | 5307 |
| 0 | 0 | 5308 |
| 0 | 1 | 5308 |
| 0 | 0 | 5309 |
| 0 | 1 | 5309 |
| 0 | 0 | 5310 |
| 0 | 1 | 5310 |
| 0 | 0 | 5311 |
| 0 | 1 | 5311 |
| 0 | 0 | 5312 |
| 0 | 1 | 5312 |
| 0 | 0 | 5313 |
| 0 | 1 | 5313 |
| 0 | 0 | 5314 |
| 0 | 1 | 5314 |
| 0 | 0 | 5315 |
| 0 | 1 | 5315 |
| 0 | 0 | 5316 |
| 0 | 1 | 5316 |
| 0 | 0 | 5317 |
| 0 | 1 | 5317 |
| 0 | 0 | 5318 |
| 0 | 1 | 5318 |
| 0 | 0 | 5319 |
| 0 | 1 | 5319 |
| 0 | 0 | 5320 |
| 0 | 1 | 5320 |
| 0 | 0 | 5321 |
| 0 | 1 | 5321 |
| 0 | 0 | 5322 |
| 0 | 1 | 5322 |
| 0 | 0 | 5323 |
| 0 | 1 | 5323 |
| 0 | 0 | 5324 |
| 0 | 1 | 5324 |
| 0 | 0 | 5325 |
| 0 | 1 | 5325 |
| 0 | 0 | 5326 |
| 0 | 1 | 5326 |
| 0 | 0 | 5327 |
| 0 | 1 | 5327 |
| 0 | 0 | 5328 |
| 0 | 1 | 5328 |
| 0 | 0 | 5329 |
| 0 | 1 | 5329 |
| 0 | 0 | 5330 |
| 0 | 1 | 5330 |
| 0 | 0 | 5331 |
| 0 | 1 | 5331 |
| 0 | 0 | 5332 |
| 0 | 1 | 5332 |
| 0 | 0 | 5333 |
| 1 | 1 | 5333 |
| 0 | 0 | 5334 |
| 0 | 1 | 5334 |
| 1 | 0 | 5335 |
| 0 | 1 | 5335 |
| 0 | 0 | 5336 |
| 0 | 1 | 5336 |
| 0 | 0 | 5337 |
| 0 | 1 | 5337 |
| 0 | 0 | 5338 |
| 0 | 1 | 5338 |
| 0 | 0 | 5339 |
| 0 | 1 | 5339 |
| 0 | 0 | 5340 |
| 0 | 1 | 5340 |
| 0 | 0 | 5341 |

|   |   |      |
|---|---|------|
| 0 | 1 | 5341 |
| 0 | 0 | 5342 |
| 0 | 1 | 5342 |
| 0 | 0 | 5343 |
| 0 | 1 | 5343 |
| 0 | 0 | 5344 |
| 0 | 1 | 5344 |
| 0 | 0 | 5345 |
| 0 | 1 | 5345 |
| 0 | 0 | 5346 |
| 0 | 1 | 5346 |
| 0 | 0 | 5347 |
| 0 | 1 | 5347 |
| 0 | 0 | 5348 |
| 0 | 1 | 5348 |
| 0 | 0 | 5349 |
| 0 | 1 | 5349 |
| 0 | 0 | 5350 |
| 0 | 1 | 5350 |
| 0 | 0 | 5351 |
| 0 | 1 | 5351 |
| 0 | 0 | 5352 |
| 0 | 1 | 5352 |
| 0 | 0 | 5353 |
| 0 | 1 | 5353 |
| 0 | 0 | 5354 |
| 0 | 1 | 5354 |
| 0 | 0 | 5355 |
| 0 | 1 | 5355 |
| 0 | 0 | 5356 |
| 0 | 1 | 5356 |
| 0 | 0 | 5357 |
| 0 | 1 | 5357 |
| 0 | 0 | 5358 |
| 0 | 1 | 5358 |
| 0 | 0 | 5359 |
| 0 | 1 | 5359 |
| 0 | 0 | 5360 |
| 0 | 1 | 5360 |
| 0 | 0 | 5361 |
| 0 | 1 | 5361 |
| 0 | 0 | 5362 |
| 0 | 1 | 5362 |
| 0 | 0 | 5363 |
| 1 | 1 | 5363 |
| 0 | 0 | 5364 |
| 0 | 1 | 5364 |
| 0 | 0 | 5365 |
| 0 | 1 | 5365 |
| 0 | 0 | 5366 |
| 1 | 1 | 5366 |
| 0 | 0 | 5367 |
| 0 | 1 | 5367 |
| 0 | 0 | 5368 |
| 0 | 1 | 5368 |
| 0 | 0 | 5369 |
| 0 | 1 | 5369 |
| 0 | 0 | 5370 |
| 0 | 1 | 5370 |
| 0 | 0 | 5371 |
| 0 | 1 | 5371 |
| 0 | 0 | 5372 |
| 0 | 1 | 5372 |
| 0 | 0 | 5373 |
| 0 | 1 | 5373 |
| 0 | 0 | 5374 |
| 0 | 1 | 5374 |
| 0 | 0 | 5375 |
| 0 | 1 | 5375 |
| 0 | 0 | 5376 |
| 1 | 1 | 5376 |
| 0 | 0 | 5377 |
| 0 | 1 | 5377 |
| 0 | 0 | 5378 |
| 0 | 1 | 5378 |
| 1 | 0 | 5379 |
| 0 | 1 | 5379 |

|   |   |      |
|---|---|------|
| 0 | 0 | 5380 |
| 0 | 1 | 5380 |
| 0 | 0 | 5381 |
| 0 | 1 | 5381 |
| 0 | 0 | 5382 |
| 1 | 1 | 5382 |
| 0 | 0 | 5383 |
| 0 | 1 | 5383 |
| 0 | 0 | 5384 |
| 0 | 1 | 5384 |
| 0 | 0 | 5385 |
| 0 | 1 | 5385 |
| 0 | 0 | 5386 |
| 0 | 1 | 5386 |
| 0 | 0 | 5387 |
| 0 | 1 | 5387 |
| 0 | 0 | 5388 |
| 0 | 1 | 5388 |
| 0 | 0 | 5389 |
| 0 | 1 | 5389 |
| 0 | 0 | 5390 |
| 0 | 1 | 5390 |
| 0 | 0 | 5391 |
| 0 | 1 | 5391 |
| 0 | 0 | 5392 |
| 0 | 1 | 5392 |
| 0 | 0 | 5393 |
| 1 | 1 | 5393 |
| 0 | 0 | 5394 |
| 0 | 1 | 5394 |
| 0 | 0 | 5395 |
| 1 | 1 | 5395 |
| 0 | 0 | 5396 |
| 0 | 1 | 5396 |
| 0 | 0 | 5397 |
| 0 | 1 | 5397 |
| 0 | 0 | 5398 |
| 0 | 1 | 5398 |
| 0 | 0 | 5399 |
| 0 | 1 | 5399 |
| 0 | 0 | 5400 |
| 1 | 1 | 5400 |
| 0 | 0 | 5401 |
| 0 | 1 | 5401 |
| 0 | 0 | 5402 |
| 0 | 1 | 5402 |
| 0 | 0 | 5403 |
| 0 | 1 | 5403 |
| 0 | 0 | 5404 |
| 0 | 1 | 5404 |
| 0 | 0 | 5405 |
| 0 | 1 | 5405 |
| 0 | 0 | 5406 |
| 0 | 1 | 5406 |
| 0 | 0 | 5407 |
| 0 | 1 | 5407 |
| 0 | 0 | 5408 |
| 0 | 1 | 5408 |
| 0 | 0 | 5409 |
| 0 | 1 | 5409 |
| 0 | 0 | 5410 |
| 0 | 1 | 5410 |
| 0 | 0 | 5411 |
| 0 | 1 | 5411 |
| 0 | 0 | 5412 |
| 0 | 1 | 5412 |
| 0 | 0 | 5413 |
| 0 | 1 | 5413 |
| 0 | 0 | 5414 |
| 0 | 1 | 5414 |
| 0 | 0 | 5415 |
| 0 | 1 | 5415 |
| 0 | 0 | 5416 |
| 0 | 1 | 5416 |
| 0 | 0 | 5417 |
| 0 | 1 | 5417 |
| 0 | 0 | 5418 |

|   |   |      |
|---|---|------|
| 0 | 1 | 5418 |
| 0 | 0 | 5419 |
| 0 | 1 | 5419 |
| 0 | 0 | 5420 |
| 0 | 1 | 5420 |
| 0 | 0 | 5421 |
| 0 | 1 | 5421 |
| 0 | 0 | 5422 |
| 0 | 1 | 5422 |
| 0 | 0 | 5423 |
| 0 | 1 | 5423 |
| 0 | 0 | 5424 |
| 0 | 1 | 5424 |
| 0 | 0 | 5425 |
| 0 | 1 | 5425 |
| 0 | 0 | 5426 |
| 0 | 1 | 5426 |
| 0 | 0 | 5427 |
| 0 | 1 | 5427 |
| 0 | 0 | 5428 |
| 0 | 1 | 5428 |
| 0 | 0 | 5429 |
| 0 | 1 | 5429 |
| 0 | 0 | 5430 |
| 0 | 1 | 5430 |
| 0 | 0 | 5431 |
| 0 | 1 | 5431 |
| 0 | 0 | 5432 |
| 0 | 1 | 5432 |
| 0 | 0 | 5433 |
| 0 | 1 | 5433 |
| 0 | 0 | 5434 |
| 0 | 1 | 5434 |
| 0 | 0 | 5435 |
| 0 | 1 | 5435 |
| 0 | 0 | 5436 |
| 1 | 1 | 5436 |
| 1 | 0 | 5437 |
| 0 | 1 | 5437 |
| 0 | 0 | 5438 |
| 0 | 1 | 5438 |
| 0 | 0 | 5439 |
| 0 | 1 | 5439 |
| 0 | 0 | 5440 |
| 0 | 1 | 5440 |
| 0 | 0 | 5441 |
| 0 | 1 | 5441 |
| 0 | 0 | 5442 |
| 0 | 1 | 5442 |
| 0 | 0 | 5443 |
| 0 | 1 | 5443 |
| 0 | 0 | 5444 |
| 0 | 1 | 5444 |
| 0 | 0 | 5445 |
| 0 | 1 | 5445 |
| 0 | 0 | 5446 |
| 0 | 1 | 5446 |
| 0 | 0 | 5447 |
| 0 | 1 | 5447 |
| 0 | 0 | 5448 |
| 0 | 1 | 5448 |
| 0 | 0 | 5449 |
| 0 | 1 | 5449 |
| 0 | 0 | 5450 |
| 0 | 1 | 5450 |
| 0 | 0 | 5451 |
| 0 | 1 | 5451 |
| 0 | 0 | 5452 |
| 0 | 1 | 5452 |
| 0 | 0 | 5453 |
| 0 | 1 | 5453 |
| 0 | 0 | 5454 |
| 0 | 1 | 5454 |
| 0 | 0 | 5455 |
| 0 | 1 | 5455 |
| 0 | 0 | 5456 |
| 0 | 1 | 5456 |

|   |   |      |
|---|---|------|
| 0 | 0 | 5457 |
| 0 | 1 | 5457 |
| 0 | 0 | 5458 |
| 0 | 1 | 5458 |
| 0 | 0 | 5459 |
| 0 | 1 | 5459 |
| 0 | 0 | 5460 |
| 0 | 1 | 5460 |
| 0 | 0 | 5461 |
| 1 | 1 | 5461 |
| 0 | 0 | 5462 |
| 0 | 1 | 5462 |
| 0 | 0 | 5463 |
| 0 | 1 | 5463 |
| 0 | 0 | 5464 |
| 0 | 1 | 5464 |
| 0 | 0 | 5465 |
| 0 | 1 | 5465 |
| 0 | 0 | 5466 |
| 1 | 1 | 5466 |
| 0 | 0 | 5467 |
| 0 | 1 | 5467 |
| 0 | 0 | 5468 |
| 0 | 1 | 5468 |
| 0 | 0 | 5469 |
| 0 | 1 | 5469 |
| 0 | 0 | 5470 |
| 0 | 1 | 5470 |
| 0 | 0 | 5471 |
| 0 | 1 | 5471 |
| 0 | 0 | 5472 |
| 0 | 1 | 5472 |
| 0 | 0 | 5473 |
| 0 | 1 | 5473 |
| 0 | 0 | 5474 |
| 0 | 1 | 5474 |
| 0 | 0 | 5475 |
| 0 | 1 | 5475 |
| 0 | 0 | 5476 |
| 0 | 1 | 5476 |
| 0 | 0 | 5477 |
| 0 | 1 | 5477 |
| 0 | 0 | 5478 |
| 0 | 1 | 5478 |
| 0 | 0 | 5479 |
| 0 | 1 | 5479 |
| 0 | 0 | 5480 |
| 0 | 1 | 5480 |
| 0 | 0 | 5481 |
| 0 | 1 | 5481 |
| 0 | 0 | 5482 |
| 0 | 1 | 5482 |
| 0 | 0 | 5483 |
| 1 | 1 | 5483 |
| 0 | 0 | 5484 |
| 0 | 1 | 5484 |
| 0 | 0 | 5485 |
| 0 | 1 | 5485 |
| 0 | 0 | 5486 |
| 0 | 1 | 5486 |
| 0 | 0 | 5487 |
| 0 | 1 | 5487 |
| 0 | 0 | 5488 |
| 0 | 1 | 5488 |
| 0 | 0 | 5489 |
| 0 | 1 | 5489 |
| 0 | 0 | 5490 |
| 0 | 1 | 5490 |
| 0 | 0 | 5491 |
| 0 | 1 | 5491 |
| 0 | 0 | 5492 |
| 0 | 1 | 5492 |
| 0 | 0 | 5493 |
| 0 | 1 | 5493 |
| 0 | 0 | 5494 |
| 0 | 1 | 5494 |
| 0 | 0 | 5495 |

|   |   |      |
|---|---|------|
| 0 | 1 | 5495 |
| 0 | 0 | 5496 |
| 0 | 1 | 5496 |
| 0 | 0 | 5497 |
| 0 | 1 | 5497 |
| 0 | 0 | 5498 |
| 0 | 1 | 5498 |
| 0 | 0 | 5499 |
| 0 | 1 | 5499 |
| 0 | 0 | 5500 |
| 0 | 1 | 5500 |
| 0 | 0 | 5501 |
| 0 | 1 | 5501 |
| 0 | 0 | 5502 |
| 0 | 1 | 5502 |
| 0 | 0 | 5503 |
| 0 | 1 | 5503 |
| 0 | 0 | 5504 |
| 0 | 1 | 5504 |
| 0 | 0 | 5505 |
| 0 | 1 | 5505 |
| 0 | 0 | 5506 |
| 0 | 1 | 5506 |
| 0 | 0 | 5507 |
| 0 | 1 | 5507 |
| 0 | 0 | 5508 |
| 0 | 1 | 5508 |
| 0 | 0 | 5509 |
| 0 | 1 | 5509 |
| 0 | 0 | 5510 |
| 0 | 1 | 5510 |
| 0 | 0 | 5511 |
| 0 | 1 | 5511 |
| 0 | 0 | 5512 |
| 0 | 1 | 5512 |
| 0 | 0 | 5513 |
| 0 | 1 | 5513 |
| 0 | 0 | 5514 |
| 0 | 1 | 5514 |
| 0 | 0 | 5515 |
| 0 | 1 | 5515 |
| 0 | 0 | 5516 |
| 0 | 1 | 5516 |
| 0 | 0 | 5517 |
| 0 | 1 | 5517 |
| 0 | 0 | 5518 |
| 0 | 1 | 5518 |
| 0 | 0 | 5519 |
| 0 | 1 | 5519 |
| 0 | 0 | 5520 |
| 0 | 1 | 5520 |
| 0 | 0 | 5521 |
| 0 | 1 | 5521 |
| 0 | 0 | 5522 |
| 0 | 1 | 5522 |
| 0 | 0 | 5523 |
| 0 | 1 | 5523 |
| 0 | 0 | 5524 |
| 0 | 1 | 5524 |
| 0 | 0 | 5525 |
| 0 | 1 | 5525 |
| 0 | 0 | 5526 |
| 0 | 1 | 5526 |
| 0 | 0 | 5527 |
| 0 | 1 | 5527 |
| 0 | 0 | 5528 |
| 0 | 1 | 5528 |
| 0 | 0 | 5529 |
| 0 | 1 | 5529 |
| 0 | 0 | 5530 |
| 0 | 1 | 5530 |
| 0 | 0 | 5531 |
| 0 | 1 | 5531 |
| 0 | 0 | 5532 |
| 0 | 1 | 5532 |
| 0 | 0 | 5533 |
| 0 | 1 | 5533 |

|   |   |      |
|---|---|------|
| 0 | 0 | 5534 |
| 0 | 1 | 5534 |
| 0 | 0 | 5535 |
| 0 | 1 | 5535 |
| 0 | 0 | 5536 |
| 0 | 1 | 5536 |
| 0 | 0 | 5537 |
| 0 | 1 | 5537 |
| 0 | 0 | 5538 |
| 0 | 1 | 5538 |
| 0 | 0 | 5539 |
| 0 | 1 | 5539 |
| 0 | 0 | 5540 |
| 0 | 1 | 5540 |
| 0 | 0 | 5541 |
| 0 | 1 | 5541 |
| 0 | 0 | 5542 |
| 0 | 1 | 5542 |
| 0 | 0 | 5543 |
| 0 | 1 | 5543 |
| 0 | 0 | 5544 |
| 0 | 1 | 5544 |
| 0 | 0 | 5545 |
| 0 | 1 | 5545 |
| 1 | 0 | 5546 |
| 0 | 1 | 5546 |
| 0 | 0 | 5547 |
| 1 | 1 | 5547 |
| 0 | 0 | 5548 |
| 0 | 1 | 5548 |
| 0 | 0 | 5549 |
| 0 | 1 | 5549 |
| 0 | 0 | 5550 |
| 0 | 1 | 5550 |
| 0 | 0 | 5551 |
| 0 | 1 | 5551 |
| 0 | 0 | 5552 |
| 0 | 1 | 5552 |
| 0 | 0 | 5553 |
| 0 | 1 | 5553 |
| 0 | 0 | 5554 |
| 0 | 1 | 5554 |
| 0 | 0 | 5555 |
| 0 | 1 | 5555 |
| 0 | 0 | 5556 |
| 0 | 1 | 5556 |
| 0 | 0 | 5557 |
| 0 | 1 | 5557 |
| 0 | 0 | 5558 |
| 0 | 1 | 5558 |
| 0 | 0 | 5559 |
| 0 | 1 | 5559 |
| 0 | 0 | 5560 |
| 0 | 1 | 5560 |
| 0 | 0 | 5561 |
| 0 | 1 | 5561 |
| 0 | 0 | 5562 |
| 0 | 1 | 5562 |
| 0 | 0 | 5563 |
| 0 | 1 | 5563 |
| 1 | 0 | 5564 |
| 0 | 1 | 5564 |
| 0 | 0 | 5565 |
| 0 | 1 | 5565 |
| 0 | 0 | 5566 |
| 0 | 1 | 5566 |
| 0 | 0 | 5567 |
| 0 | 1 | 5567 |
| 0 | 0 | 5568 |
| 0 | 1 | 5568 |
| 0 | 0 | 5569 |
| 0 | 1 | 5569 |
| 0 | 0 | 5570 |
| 0 | 1 | 5570 |
| 0 | 0 | 5571 |
| 0 | 1 | 5571 |
| 0 | 0 | 5572 |

|   |   |      |
|---|---|------|
| 0 | 1 | 5572 |
| 0 | 0 | 5573 |
| 0 | 1 | 5573 |
| 0 | 0 | 5574 |
| 0 | 1 | 5574 |
| 0 | 0 | 5575 |
| 0 | 1 | 5575 |
| 0 | 0 | 5576 |
| 0 | 1 | 5576 |
| 0 | 0 | 5577 |
| 0 | 1 | 5577 |
| 0 | 0 | 5578 |
| 0 | 1 | 5578 |
| 0 | 0 | 5579 |
| 0 | 1 | 5579 |
| 0 | 0 | 5580 |
| 0 | 1 | 5580 |
| 0 | 0 | 5581 |
| 0 | 1 | 5581 |
| 0 | 0 | 5582 |
| 0 | 1 | 5582 |
| 0 | 0 | 5583 |
| 0 | 1 | 5583 |
| 0 | 0 | 5584 |
| 0 | 1 | 5584 |
| 0 | 0 | 5585 |
| 1 | 1 | 5585 |
| 0 | 0 | 5586 |
| 0 | 1 | 5586 |
| 0 | 0 | 5587 |
| 0 | 1 | 5587 |
| 0 | 0 | 5588 |
| 0 | 1 | 5588 |
| 0 | 0 | 5589 |
| 0 | 1 | 5589 |
| 0 | 0 | 5590 |
| 0 | 1 | 5590 |
| 0 | 0 | 5591 |
| 0 | 1 | 5591 |
| 0 | 0 | 5592 |
| 0 | 1 | 5592 |
| 0 | 0 | 5593 |
| 0 | 1 | 5593 |
| 0 | 0 | 5594 |
| 0 | 1 | 5594 |
| 0 | 0 | 5595 |
| 0 | 1 | 5595 |
| 0 | 0 | 5596 |
| 0 | 1 | 5596 |
| 0 | 0 | 5597 |
| 0 | 1 | 5597 |
| 0 | 0 | 5598 |
| 0 | 1 | 5598 |
| 0 | 0 | 5599 |
| 0 | 1 | 5599 |
| 0 | 0 | 5600 |
| 0 | 1 | 5600 |
| 0 | 0 | 5601 |
| 0 | 1 | 5601 |
| 0 | 0 | 5602 |
| 0 | 1 | 5602 |
| 0 | 0 | 5603 |
| 0 | 1 | 5603 |
| 0 | 0 | 5604 |
| 0 | 1 | 5604 |
| 0 | 0 | 5605 |
| 0 | 1 | 5605 |
| 0 | 0 | 5606 |
| 0 | 1 | 5606 |
| 0 | 0 | 5607 |
| 0 | 1 | 5607 |
| 0 | 0 | 5608 |
| 0 | 1 | 5608 |
| 0 | 0 | 5609 |
| 0 | 1 | 5609 |
| 0 | 0 | 5610 |
| 0 | 1 | 5610 |



|   |   |      |
|---|---|------|
| 0 | 0 | 5611 |
| 0 | 1 | 5611 |
| 0 | 0 | 5612 |
| 0 | 1 | 5612 |
| 0 | 0 | 5613 |
| 0 | 1 | 5613 |
| 0 | 0 | 5614 |
| 0 | 1 | 5614 |
| 0 | 0 | 5615 |
| 0 | 1 | 5615 |
| 0 | 0 | 5616 |
| 0 | 1 | 5616 |
| 0 | 0 | 5617 |
| 0 | 1 | 5617 |
| 0 | 0 | 5618 |
| 0 | 1 | 5618 |
| 0 | 0 | 5619 |
| 0 | 1 | 5619 |
| 0 | 0 | 5620 |
| 0 | 1 | 5620 |
| 0 | 0 | 5621 |
| 0 | 1 | 5621 |
| 0 | 0 | 5622 |
| 0 | 1 | 5622 |
| 0 | 0 | 5623 |
| 0 | 1 | 5623 |
| 1 | 0 | 5624 |
| 0 | 1 | 5624 |
| 0 | 0 | 5625 |
| 0 | 1 | 5625 |
| 0 | 0 | 5626 |
| 0 | 1 | 5626 |
| 0 | 0 | 5627 |
| 0 | 1 | 5627 |
| 0 | 0 | 5628 |
| 0 | 1 | 5628 |
| 0 | 0 | 5629 |
| 0 | 1 | 5629 |
| 0 | 0 | 5630 |
| 0 | 1 | 5630 |
| 0 | 0 | 5631 |
| 0 | 1 | 5631 |
| 0 | 0 | 5632 |
| 0 | 1 | 5632 |
| 0 | 0 | 5633 |
| 0 | 1 | 5633 |
| 0 | 0 | 5634 |
| 0 | 1 | 5634 |
| 0 | 0 | 5635 |
| 0 | 1 | 5635 |
| 1 | 0 | 5636 |
| 1 | 1 | 5636 |
| 0 | 0 | 5637 |
| 0 | 1 | 5637 |
| 0 | 0 | 5638 |
| 0 | 1 | 5638 |
| 0 | 0 | 5639 |
| 0 | 1 | 5639 |
| 0 | 0 | 5640 |
| 0 | 1 | 5640 |
| 0 | 0 | 5641 |
| 0 | 1 | 5641 |
| 0 | 0 | 5642 |
| 0 | 1 | 5642 |
| 0 | 0 | 5643 |
| 0 | 1 | 5643 |
| 0 | 0 | 5644 |
| 0 | 1 | 5644 |
| 0 | 0 | 5645 |
| 0 | 1 | 5645 |
| 0 | 0 | 5646 |
| 0 | 1 | 5646 |
| 0 | 0 | 5647 |
| 0 | 1 | 5647 |
| 0 | 0 | 5648 |
| 0 | 1 | 5648 |
| 0 | 0 | 5649 |

|   |   |      |
|---|---|------|
| 0 | 1 | 5649 |
| 0 | 0 | 5650 |
| 0 | 1 | 5650 |
| 0 | 0 | 5651 |
| 0 | 1 | 5651 |
| 0 | 0 | 5652 |
| 0 | 1 | 5652 |
| 0 | 0 | 5653 |
| 0 | 1 | 5653 |
| 1 | 0 | 5654 |
| 0 | 1 | 5654 |
| 0 | 0 | 5655 |
| 0 | 1 | 5655 |
| 0 | 0 | 5656 |
| 0 | 1 | 5656 |
| 0 | 0 | 5657 |
| 1 | 1 | 5657 |
| 0 | 0 | 5658 |
| 1 | 1 | 5658 |
| 0 | 0 | 5659 |
| 0 | 1 | 5659 |
| 0 | 0 | 5660 |
| 0 | 1 | 5660 |
| 0 | 0 | 5661 |
| 0 | 1 | 5661 |
| 0 | 0 | 5662 |
| 0 | 1 | 5662 |
| 0 | 0 | 5663 |
| 0 | 1 | 5663 |
| 0 | 0 | 5664 |
| 0 | 1 | 5664 |
| 0 | 0 | 5665 |
| 0 | 1 | 5665 |
| 0 | 0 | 5666 |
| 0 | 1 | 5666 |
| 1 | 0 | 5667 |
| 1 | 1 | 5667 |
| 0 | 0 | 5668 |
| 0 | 1 | 5668 |
| 0 | 0 | 5669 |
| 1 | 1 | 5669 |
| 0 | 0 | 5670 |
| 0 | 1 | 5670 |
| 0 | 0 | 5671 |
| 0 | 1 | 5671 |
| 0 | 0 | 5672 |
| 0 | 1 | 5672 |
| 0 | 0 | 5673 |
| 0 | 1 | 5673 |
| 0 | 0 | 5674 |
| 0 | 1 | 5674 |
| 1 | 0 | 5675 |
| 0 | 1 | 5675 |
| 1 | 0 | 5676 |
| 1 | 1 | 5676 |
| 0 | 0 | 5677 |
| 0 | 1 | 5677 |
| 1 | 0 | 5678 |
| 0 | 1 | 5678 |
| 0 | 0 | 5679 |
| 0 | 1 | 5679 |
| 0 | 0 | 5680 |
| 0 | 1 | 5680 |
| 0 | 0 | 5681 |
| 0 | 1 | 5681 |
| 0 | 0 | 5682 |
| 0 | 1 | 5682 |
| 0 | 0 | 5683 |
| 0 | 1 | 5683 |
| 0 | 0 | 5684 |
| 0 | 1 | 5684 |
| 0 | 0 | 5685 |
| 0 | 1 | 5685 |
| 0 | 0 | 5686 |
| 0 | 1 | 5686 |
| 0 | 0 | 5687 |
| 0 | 1 | 5687 |

|   |   |      |
|---|---|------|
| 0 | 0 | 5688 |
| 0 | 1 | 5688 |
| 0 | 0 | 5689 |
| 0 | 1 | 5689 |
| 0 | 0 | 5690 |
| 0 | 1 | 5690 |
| 0 | 0 | 5691 |
| 0 | 1 | 5691 |
| 0 | 0 | 5692 |
| 0 | 1 | 5692 |
| 0 | 0 | 5693 |
| 0 | 1 | 5693 |
| 0 | 0 | 5694 |
| 0 | 1 | 5694 |
| 0 | 0 | 5695 |
| 0 | 1 | 5695 |
| 0 | 0 | 5696 |
| 0 | 1 | 5696 |
| 1 | 0 | 5697 |
| 0 | 1 | 5697 |
| 0 | 0 | 5698 |
| 0 | 1 | 5698 |
| 0 | 0 | 5699 |
| 0 | 1 | 5699 |
| 0 | 0 | 5700 |
| 0 | 1 | 5700 |
| 0 | 0 | 5701 |
| 0 | 1 | 5701 |
| 0 | 0 | 5702 |
| 0 | 1 | 5702 |
| 0 | 0 | 5703 |
| 0 | 1 | 5703 |
| 0 | 0 | 5704 |
| 0 | 1 | 5704 |
| 0 | 0 | 5705 |
| 0 | 1 | 5705 |
| 0 | 0 | 5706 |
| 0 | 1 | 5706 |
| 0 | 0 | 5707 |
| 0 | 1 | 5707 |
| 0 | 0 | 5708 |
| 0 | 1 | 5708 |
| 0 | 0 | 5709 |
| 0 | 1 | 5709 |
| 0 | 0 | 5710 |
| 0 | 1 | 5710 |
| 0 | 0 | 5711 |
| 0 | 1 | 5711 |
| 0 | 0 | 5712 |
| 0 | 1 | 5712 |
| 0 | 0 | 5713 |
| 0 | 1 | 5713 |
| 0 | 0 | 5714 |
| 0 | 1 | 5714 |
| 0 | 0 | 5715 |
| 0 | 1 | 5715 |
| 0 | 0 | 5716 |
| 0 | 1 | 5716 |
| 0 | 0 | 5717 |
| 0 | 1 | 5717 |
| 0 | 0 | 5718 |
| 0 | 1 | 5718 |
| 0 | 0 | 5719 |
| 0 | 1 | 5719 |
| 0 | 0 | 5720 |
| 0 | 1 | 5720 |
| 0 | 0 | 5721 |
| 0 | 1 | 5721 |
| 0 | 0 | 5722 |
| 0 | 1 | 5722 |
| 0 | 0 | 5723 |
| 0 | 1 | 5723 |
| 0 | 0 | 5724 |
| 0 | 1 | 5724 |
| 0 | 0 | 5725 |
| 0 | 1 | 5725 |
| 0 | 0 | 5726 |

|   |   |      |
|---|---|------|
| 0 | 1 | 5726 |
| 0 | 0 | 5727 |
| 0 | 1 | 5727 |
| 0 | 0 | 5728 |
| 0 | 1 | 5728 |
| 0 | 0 | 5729 |
| 0 | 1 | 5729 |
| 0 | 0 | 5730 |
| 0 | 1 | 5730 |
| 0 | 0 | 5731 |
| 0 | 1 | 5731 |
| 0 | 0 | 5732 |
| 0 | 1 | 5732 |
| 0 | 0 | 5733 |
| 0 | 1 | 5733 |
| 0 | 0 | 5734 |
| 0 | 1 | 5734 |
| 0 | 0 | 5735 |
| 0 | 1 | 5735 |
| 0 | 0 | 5736 |
| 0 | 1 | 5736 |
| 0 | 0 | 5737 |
| 0 | 1 | 5737 |
| 0 | 0 | 5738 |
| 0 | 1 | 5738 |
| 0 | 0 | 5739 |
| 0 | 1 | 5739 |
| 0 | 0 | 5740 |
| 0 | 1 | 5740 |
| 0 | 0 | 5741 |
| 0 | 1 | 5741 |
| 0 | 0 | 5742 |
| 0 | 1 | 5742 |
| 0 | 0 | 5743 |
| 0 | 1 | 5743 |
| 0 | 0 | 5744 |
| 0 | 1 | 5744 |
| 0 | 0 | 5745 |
| 1 | 1 | 5745 |
| 0 | 0 | 5746 |
| 0 | 1 | 5746 |
| 0 | 0 | 5747 |
| 0 | 1 | 5747 |
| 0 | 0 | 5748 |
| 0 | 1 | 5748 |
| 0 | 0 | 5749 |
| 0 | 1 | 5749 |
| 0 | 0 | 5750 |
| 0 | 1 | 5750 |
| 0 | 0 | 5751 |
| 0 | 1 | 5751 |
| 0 | 0 | 5752 |
| 0 | 1 | 5752 |
| 0 | 0 | 5753 |
| 0 | 1 | 5753 |
| 0 | 0 | 5754 |
| 0 | 1 | 5754 |
| 0 | 0 | 5755 |
| 0 | 1 | 5755 |
| 0 | 0 | 5756 |
| 0 | 1 | 5756 |
| 0 | 0 | 5757 |
| 0 | 1 | 5757 |
| 0 | 0 | 5758 |
| 0 | 1 | 5758 |
| 0 | 0 | 5759 |
| 0 | 1 | 5759 |
| 0 | 0 | 5760 |
| 0 | 1 | 5760 |
| 0 | 0 | 5761 |
| 0 | 1 | 5761 |
| 0 | 0 | 5762 |
| 0 | 1 | 5762 |
| 0 | 0 | 5763 |
| 0 | 1 | 5763 |
| 0 | 0 | 5764 |
| 0 | 1 | 5764 |

|   |   |      |
|---|---|------|
| 0 | 0 | 5765 |
| 0 | 1 | 5765 |
| 0 | 0 | 5766 |
| 0 | 1 | 5766 |
| 0 | 0 | 5767 |
| 0 | 1 | 5767 |
| 0 | 0 | 5768 |
| 0 | 1 | 5768 |
| 0 | 0 | 5769 |
| 0 | 1 | 5769 |
| 0 | 0 | 5770 |
| 0 | 1 | 5770 |
| 0 | 0 | 5771 |
| 0 | 1 | 5771 |
| 0 | 0 | 5772 |
| 0 | 1 | 5772 |
| 0 | 0 | 5773 |
| 0 | 1 | 5773 |
| 0 | 0 | 5774 |
| 0 | 1 | 5774 |
| 0 | 0 | 5775 |
| 0 | 1 | 5775 |
| 0 | 0 | 5776 |
| 0 | 1 | 5776 |
| 0 | 0 | 5777 |
| 0 | 1 | 5777 |
| 0 | 0 | 5778 |
| 0 | 1 | 5778 |
| 0 | 0 | 5779 |
| 0 | 1 | 5779 |
| 0 | 0 | 5780 |
| 0 | 1 | 5780 |
| 0 | 0 | 5781 |
| 0 | 1 | 5781 |
| 0 | 0 | 5782 |
| 0 | 1 | 5782 |
| 0 | 0 | 5783 |
| 0 | 1 | 5783 |
| 0 | 0 | 5784 |
| 0 | 1 | 5784 |
| 0 | 0 | 5785 |
| 0 | 1 | 5785 |
| 1 | 0 | 5786 |
| 0 | 1 | 5786 |
| 0 | 0 | 5787 |
| 0 | 1 | 5787 |
| 0 | 0 | 5788 |
| 0 | 1 | 5788 |
| 0 | 0 | 5789 |
| 0 | 1 | 5789 |
| 0 | 0 | 5790 |
| 0 | 1 | 5790 |
| 0 | 0 | 5791 |
| 0 | 1 | 5791 |
| 0 | 0 | 5792 |
| 0 | 1 | 5792 |
| 0 | 0 | 5793 |
| 0 | 1 | 5793 |
| 0 | 0 | 5794 |
| 0 | 1 | 5794 |
| 0 | 0 | 5795 |
| 0 | 1 | 5795 |
| 0 | 0 | 5796 |
| 0 | 1 | 5796 |
| 0 | 0 | 5797 |
| 0 | 1 | 5797 |
| 0 | 0 | 5798 |
| 0 | 1 | 5798 |
| 0 | 0 | 5799 |
| 0 | 1 | 5799 |
| 0 | 0 | 5800 |
| 0 | 1 | 5800 |
| 0 | 0 | 5801 |
| 0 | 1 | 5801 |
| 0 | 0 | 5802 |
| 0 | 1 | 5802 |
| 0 | 0 | 5803 |

|   |   |      |
|---|---|------|
| 0 | 1 | 5803 |
| 0 | 0 | 5804 |
| 0 | 1 | 5804 |
| 0 | 0 | 5805 |
| 0 | 1 | 5805 |
| 0 | 0 | 5806 |
| 0 | 1 | 5806 |
| 0 | 0 | 5807 |
| 0 | 1 | 5807 |
| 0 | 0 | 5808 |
| 0 | 1 | 5808 |
| 0 | 0 | 5809 |
| 0 | 1 | 5809 |
| 0 | 0 | 5810 |
| 0 | 1 | 5810 |
| 0 | 0 | 5811 |
| 0 | 1 | 5811 |
| 0 | 0 | 5812 |
| 0 | 1 | 5812 |
| 0 | 0 | 5813 |
| 0 | 1 | 5813 |
| 0 | 0 | 5814 |
| 0 | 1 | 5814 |
| 0 | 0 | 5815 |
| 0 | 1 | 5815 |
| 0 | 0 | 5816 |
| 0 | 1 | 5816 |
| 0 | 0 | 5817 |
| 0 | 1 | 5817 |
| 0 | 0 | 5818 |
| 0 | 1 | 5818 |
| 0 | 0 | 5819 |
| 0 | 1 | 5819 |
| 0 | 0 | 5820 |
| 0 | 1 | 5820 |
| 0 | 0 | 5821 |
| 1 | 1 | 5821 |
| 0 | 0 | 5822 |
| 1 | 1 | 5822 |
| 0 | 0 | 5823 |
| 0 | 1 | 5823 |
| 0 | 0 | 5824 |
| 0 | 1 | 5824 |
| 0 | 0 | 5825 |
| 0 | 1 | 5825 |
| 0 | 0 | 5826 |
| 1 | 1 | 5826 |
| 0 | 0 | 5827 |
| 0 | 1 | 5827 |
| 0 | 0 | 5828 |
| 0 | 1 | 5828 |
| 0 | 0 | 5829 |
| 0 | 1 | 5829 |
| 0 | 0 | 5830 |
| 0 | 1 | 5830 |
| 0 | 0 | 5831 |
| 0 | 1 | 5831 |
| 0 | 0 | 5832 |
| 0 | 1 | 5832 |
| 0 | 0 | 5833 |
| 0 | 1 | 5833 |
| 0 | 0 | 5834 |
| 0 | 1 | 5834 |
| 0 | 0 | 5835 |
| 0 | 1 | 5835 |
| 0 | 0 | 5836 |
| 0 | 1 | 5836 |
| 0 | 0 | 5837 |
| 0 | 1 | 5837 |
| 0 | 0 | 5838 |
| 0 | 1 | 5838 |
| 0 | 0 | 5839 |
| 0 | 1 | 5839 |
| 0 | 0 | 5840 |
| 0 | 1 | 5840 |
| 0 | 0 | 5841 |
| 0 | 1 | 5841 |

|   |   |      |
|---|---|------|
| 0 | 0 | 5842 |
| 0 | 1 | 5842 |
| 0 | 0 | 5843 |
| 0 | 1 | 5843 |
| 0 | 0 | 5844 |
| 0 | 1 | 5844 |
| 0 | 0 | 5845 |
| 0 | 1 | 5845 |
| 0 | 0 | 5846 |
| 0 | 1 | 5846 |
| 0 | 0 | 5847 |
| 0 | 1 | 5847 |
| 0 | 0 | 5848 |
| 0 | 1 | 5848 |
| 0 | 0 | 5849 |
| 0 | 1 | 5849 |
| 0 | 0 | 5850 |
| 0 | 1 | 5850 |
| 0 | 0 | 5851 |
| 0 | 1 | 5851 |
| 0 | 0 | 5852 |
| 0 | 1 | 5852 |
| 0 | 0 | 5853 |
| 0 | 1 | 5853 |
| 0 | 0 | 5854 |
| 0 | 1 | 5854 |
| 0 | 0 | 5855 |
| 0 | 1 | 5855 |
| 0 | 0 | 5856 |
| 0 | 1 | 5856 |
| 0 | 0 | 5857 |
| 0 | 1 | 5857 |
| 0 | 0 | 5858 |
| 0 | 1 | 5858 |
| 0 | 0 | 5859 |
| 0 | 1 | 5859 |
| 0 | 0 | 5860 |
| 0 | 1 | 5860 |
| 0 | 0 | 5861 |
| 0 | 1 | 5861 |
| 0 | 0 | 5862 |
| 0 | 1 | 5862 |
| 0 | 0 | 5863 |
| 1 | 1 | 5863 |
| 1 | 0 | 5864 |
| 0 | 1 | 5864 |
| 0 | 0 | 5865 |
| 0 | 1 | 5865 |
| 0 | 0 | 5866 |
| 0 | 1 | 5866 |
| 0 | 0 | 5867 |
| 0 | 1 | 5867 |
| 0 | 0 | 5868 |
| 0 | 1 | 5868 |
| 0 | 0 | 5869 |
| 0 | 1 | 5869 |
| 0 | 0 | 5870 |
| 0 | 1 | 5870 |
| 0 | 0 | 5871 |
| 0 | 1 | 5871 |
| 0 | 0 | 5872 |
| 0 | 1 | 5872 |
| 0 | 0 | 5873 |
| 0 | 1 | 5873 |
| 0 | 0 | 5874 |
| 0 | 1 | 5874 |
| 0 | 0 | 5875 |
| 0 | 1 | 5875 |
| 0 | 0 | 5876 |
| 0 | 1 | 5876 |
| 0 | 0 | 5877 |
| 0 | 1 | 5877 |
| 0 | 0 | 5878 |
| 0 | 1 | 5878 |
| 0 | 0 | 5879 |
| 0 | 1 | 5879 |
| 0 | 0 | 5880 |

|   |   |      |
|---|---|------|
| 0 | 1 | 5880 |
| 0 | 0 | 5881 |
| 0 | 1 | 5881 |
| 0 | 0 | 5882 |
| 0 | 1 | 5882 |
| 0 | 0 | 5883 |
| 0 | 1 | 5883 |
| 0 | 0 | 5884 |
| 0 | 1 | 5884 |
| 0 | 0 | 5885 |
| 0 | 1 | 5885 |
| 0 | 0 | 5886 |
| 0 | 1 | 5886 |
| 0 | 0 | 5887 |
| 0 | 1 | 5887 |
| 0 | 0 | 5888 |
| 0 | 1 | 5888 |
| 0 | 0 | 5889 |
| 0 | 1 | 5889 |
| 0 | 0 | 5890 |
| 0 | 1 | 5890 |
| 0 | 0 | 5891 |
| 0 | 1 | 5891 |
| 0 | 0 | 5892 |
| 0 | 1 | 5892 |
| 0 | 0 | 5893 |
| 0 | 1 | 5893 |
| 0 | 0 | 5894 |
| 0 | 1 | 5894 |
| 0 | 0 | 5895 |
| 0 | 1 | 5895 |
| 0 | 0 | 5896 |
| 0 | 1 | 5896 |
| 0 | 0 | 5897 |
| 0 | 1 | 5897 |
| 0 | 0 | 5898 |
| 0 | 1 | 5898 |
| 0 | 0 | 5899 |
| 0 | 1 | 5899 |
| 0 | 0 | 5900 |
| 0 | 1 | 5900 |
| 0 | 0 | 5901 |
| 0 | 1 | 5901 |
| 0 | 0 | 5902 |
| 0 | 1 | 5902 |
| 0 | 0 | 5903 |
| 0 | 1 | 5903 |
| 0 | 0 | 5904 |
| 0 | 1 | 5904 |
| 0 | 0 | 5905 |
| 0 | 1 | 5905 |
| 0 | 0 | 5906 |
| 0 | 1 | 5906 |
| 0 | 0 | 5907 |
| 0 | 1 | 5907 |
| 0 | 0 | 5908 |
| 0 | 1 | 5908 |
| 0 | 0 | 5909 |
| 0 | 1 | 5909 |
| 0 | 0 | 5910 |
| 0 | 1 | 5910 |
| 0 | 0 | 5911 |
| 0 | 1 | 5911 |
| 0 | 0 | 5912 |
| 0 | 1 | 5912 |
| 0 | 0 | 5913 |
| 0 | 1 | 5913 |
| 0 | 0 | 5914 |
| 0 | 1 | 5914 |
| 0 | 0 | 5915 |
| 0 | 1 | 5915 |
| 1 | 0 | 5916 |
| 0 | 1 | 5916 |
| 0 | 0 | 5917 |
| 0 | 1 | 5917 |
| 0 | 0 | 5918 |
| 0 | 1 | 5918 |



|   |   |      |
|---|---|------|
| 0 | 0 | 5919 |
| 0 | 1 | 5919 |
| 0 | 0 | 5920 |
| 0 | 1 | 5920 |
| 0 | 0 | 5921 |
| 0 | 1 | 5921 |
| 0 | 0 | 5922 |
| 0 | 1 | 5922 |
| 0 | 0 | 5923 |
| 0 | 1 | 5923 |
| 0 | 0 | 5924 |
| 0 | 1 | 5924 |
| 0 | 0 | 5925 |
| 0 | 1 | 5925 |
| 0 | 0 | 5926 |
| 0 | 1 | 5926 |
| 0 | 0 | 5927 |
| 0 | 1 | 5927 |
| 0 | 0 | 5928 |
| 0 | 1 | 5928 |
| 0 | 0 | 5929 |
| 0 | 1 | 5929 |
| 0 | 0 | 5930 |
| 0 | 1 | 5930 |
| 0 | 0 | 5931 |
| 0 | 1 | 5931 |
| 0 | 0 | 5932 |
| 0 | 1 | 5932 |
| 0 | 0 | 5933 |
| 1 | 1 | 5933 |
| 0 | 0 | 5934 |
| 0 | 1 | 5934 |
| 0 | 0 | 5935 |
| 0 | 1 | 5935 |
| 0 | 0 | 5936 |
| 0 | 1 | 5936 |
| 0 | 0 | 5937 |
| 0 | 1 | 5937 |
| 0 | 0 | 5938 |
| 0 | 1 | 5938 |
| 0 | 0 | 5939 |
| 0 | 1 | 5939 |
| 0 | 0 | 5940 |
| 0 | 1 | 5940 |
| 0 | 0 | 5941 |
| 0 | 1 | 5941 |
| 0 | 0 | 5942 |
| 0 | 1 | 5942 |
| 0 | 0 | 5943 |
| 0 | 1 | 5943 |
| 0 | 0 | 5944 |
| 0 | 1 | 5944 |
| 0 | 0 | 5945 |
| 0 | 1 | 5945 |
| 0 | 0 | 5946 |
| 0 | 1 | 5946 |
| 0 | 0 | 5947 |
| 0 | 1 | 5947 |
| 0 | 0 | 5948 |
| 0 | 1 | 5948 |
| 0 | 0 | 5949 |
| 0 | 1 | 5949 |
| 0 | 0 | 5950 |
| 0 | 1 | 5950 |
| 0 | 0 | 5951 |
| 0 | 1 | 5951 |
| 0 | 0 | 5952 |
| 0 | 1 | 5952 |
| 0 | 0 | 5953 |
| 0 | 1 | 5953 |
| 0 | 0 | 5954 |
| 0 | 1 | 5954 |
| 0 | 0 | 5955 |
| 0 | 1 | 5955 |
| 0 | 0 | 5956 |
| 0 | 1 | 5956 |
| 0 | 0 | 5957 |

|   |   |      |
|---|---|------|
| 0 | 1 | 5957 |
| 0 | 0 | 5958 |
| 0 | 1 | 5958 |
| 0 | 0 | 5959 |
| 0 | 1 | 5959 |
| 0 | 0 | 5960 |
| 0 | 1 | 5960 |
| 0 | 0 | 5961 |
| 0 | 1 | 5961 |
| 0 | 0 | 5962 |
| 0 | 1 | 5962 |
| 0 | 0 | 5963 |
| 0 | 1 | 5963 |
| 0 | 0 | 5964 |
| 0 | 1 | 5964 |
| 0 | 0 | 5965 |
| 0 | 1 | 5965 |
| 0 | 0 | 5966 |
| 1 | 1 | 5966 |
| 0 | 0 | 5967 |
| 0 | 1 | 5967 |
| 0 | 0 | 5968 |
| 0 | 1 | 5968 |
| 0 | 0 | 5969 |
| 0 | 1 | 5969 |
| 0 | 0 | 5970 |
| 0 | 1 | 5970 |
| 0 | 0 | 5971 |
| 0 | 1 | 5971 |
| 0 | 0 | 5972 |
| 0 | 1 | 5972 |
| 0 | 0 | 5973 |
| 0 | 1 | 5973 |
| 0 | 0 | 5974 |
| 0 | 1 | 5974 |
| 0 | 0 | 5975 |
| 0 | 1 | 5975 |
| 0 | 0 | 5976 |
| 0 | 1 | 5976 |
| 0 | 0 | 5977 |
| 0 | 1 | 5977 |
| 0 | 0 | 5978 |
| 0 | 1 | 5978 |
| 0 | 0 | 5979 |
| 0 | 1 | 5979 |
| 0 | 0 | 5980 |
| 0 | 1 | 5980 |
| 0 | 0 | 5981 |
| 0 | 1 | 5981 |
| 0 | 0 | 5982 |
| 0 | 1 | 5982 |
| 0 | 0 | 5983 |
| 0 | 1 | 5983 |
| 0 | 0 | 5984 |
| 0 | 1 | 5984 |
| 0 | 0 | 5985 |
| 0 | 1 | 5985 |
| 0 | 0 | 5986 |
| 0 | 1 | 5986 |
| 0 | 0 | 5987 |
| 0 | 1 | 5987 |
| 0 | 0 | 5988 |
| 0 | 1 | 5988 |
| 0 | 0 | 5989 |
| 0 | 1 | 5989 |
| 0 | 0 | 5990 |
| 0 | 1 | 5990 |
| 0 | 0 | 5991 |
| 0 | 1 | 5991 |
| 0 | 0 | 5992 |
| 0 | 1 | 5992 |
| 0 | 0 | 5993 |
| 0 | 1 | 5993 |
| 0 | 0 | 5994 |
| 0 | 1 | 5994 |
| 0 | 0 | 5995 |
| 0 | 1 | 5995 |

|   |   |      |
|---|---|------|
| 0 | 0 | 5996 |
| 0 | 1 | 5996 |
| 0 | 0 | 5997 |
| 0 | 1 | 5997 |
| 0 | 0 | 5998 |
| 0 | 1 | 5998 |
| 0 | 0 | 5999 |
| 0 | 1 | 5999 |
| 1 | 0 | 6000 |
| 0 | 1 | 6000 |
